# Supplementary material for: Associations between unilateral amblyopia in childhood and cardiometabolic disorders in adult life: a cross-sectional and longitudinal analysis of the UK Biobank
Source: PubMed Central journal article supplement (PMC11056416; doi:10.1016/j.eclinm.2024.102493), 2024-03-07
Supplement: mmc1.pdf [file mmc1.pdf]

**On-line supplementary material**

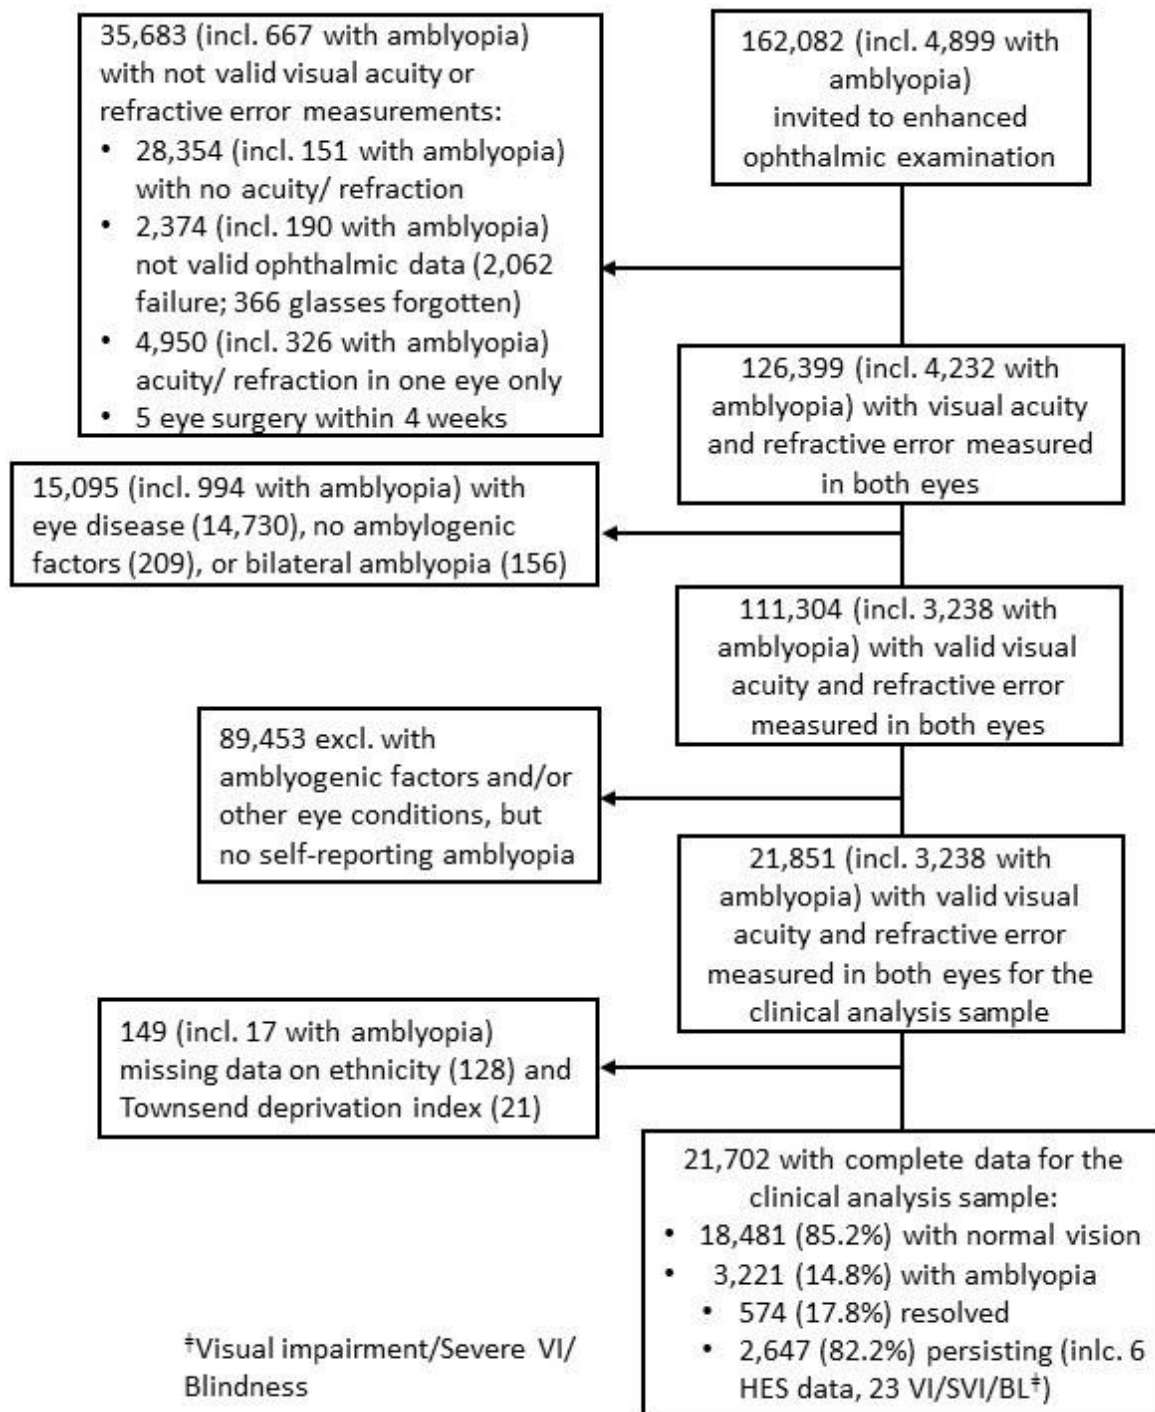

**Supplementary Figure 1.** Flow of participants in the clinical sample study.

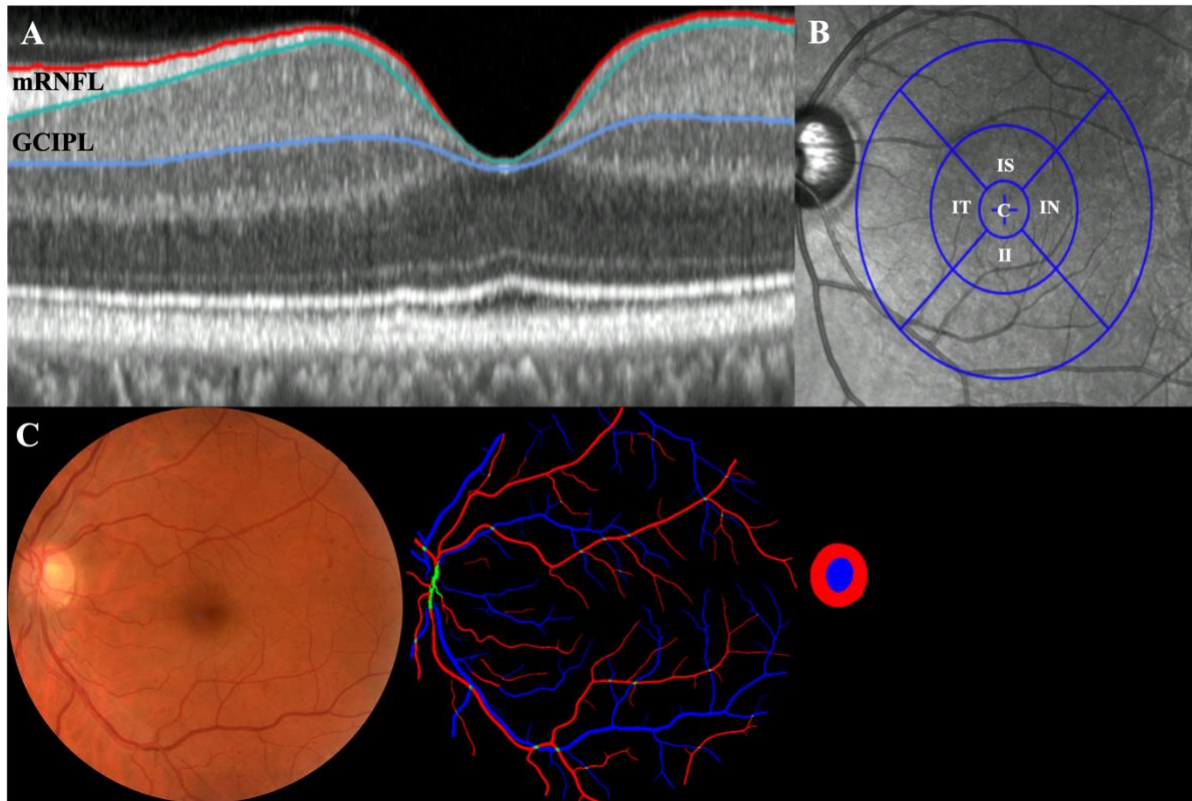

**Supplementary Figure 2.** Example retinal images. Macula-centered optical coherence tomography with the retinal nerve fiber (mRNFL) and ganglion cell-inner plexiform layer indicated (mGC-IPL) (A). Sublayer thicknesses were averaged across the four parafoveal grids (IS - Inner Superior region; IN - Inner Nasal region; II - Inner Inferior region; IT - Inner Temporal Region) (B). Retinal vasculature and the optic nerve were segmented from raw color fundus photographs by AutoMorph to derive vessel maps, from which morphometric indices were estimated (C).

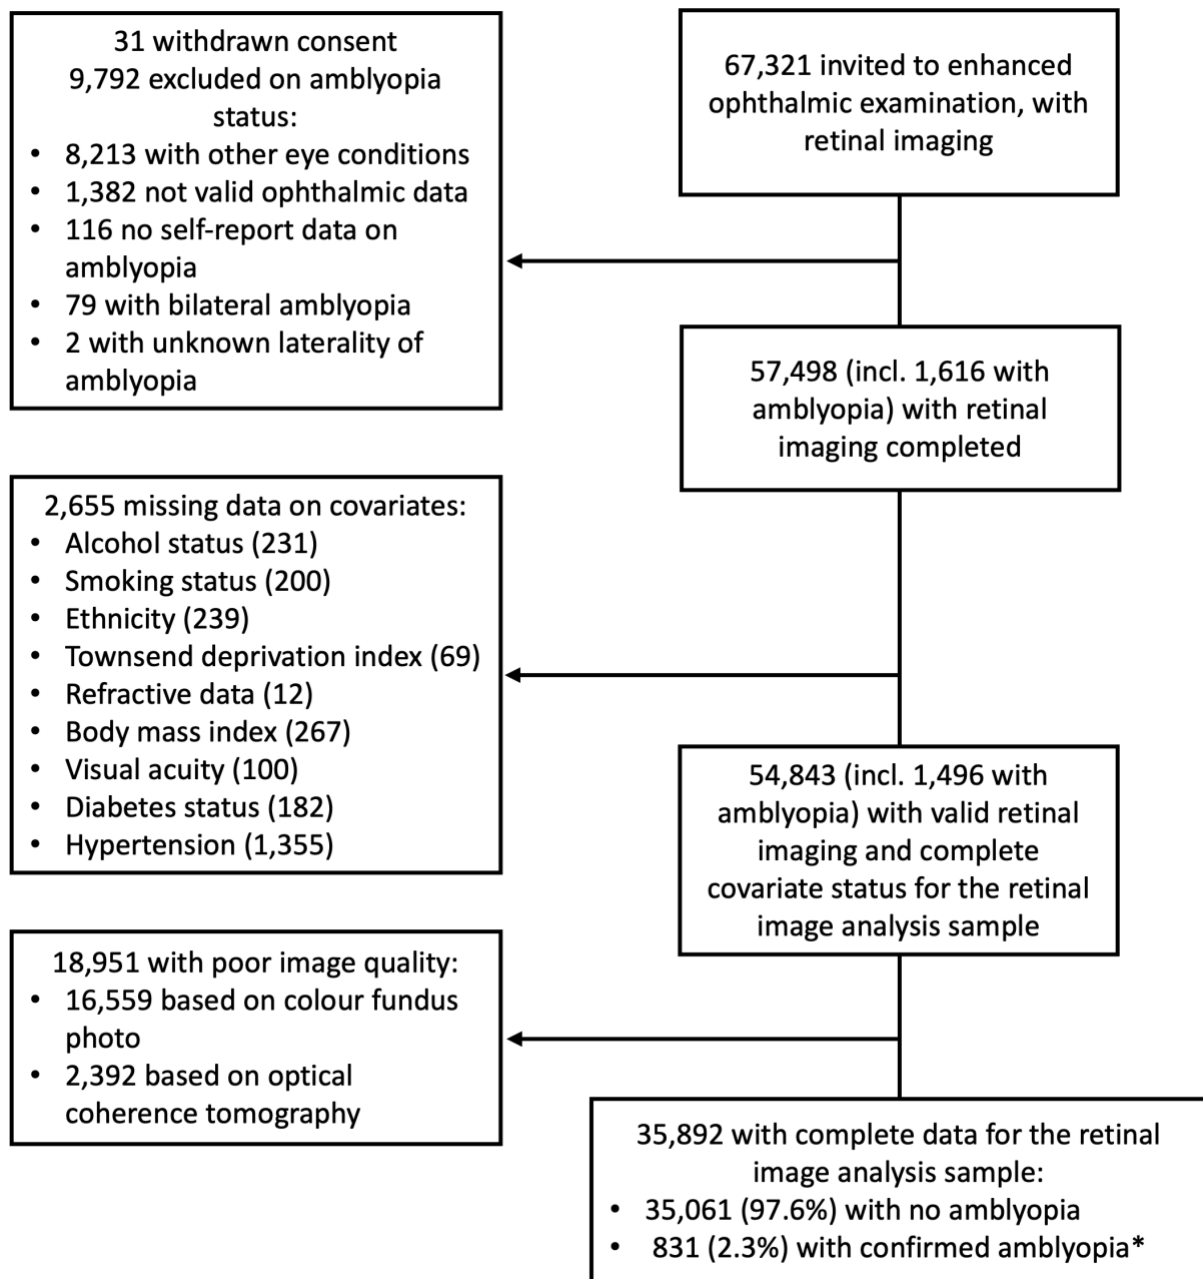

**Supplementary Figure 3.** Flow of participants in the retinal image analysis.

\*From 831 participants with confirmed amblyopia, 623 eyes from 623 participants had sufficient quality retinal imaging of an affected amblyopic eye sufficient for analysis (483 persisting and 140 resolved). 663 eyes from 663 participants were unaffected fellow eyes. The difference is due to image quality control.

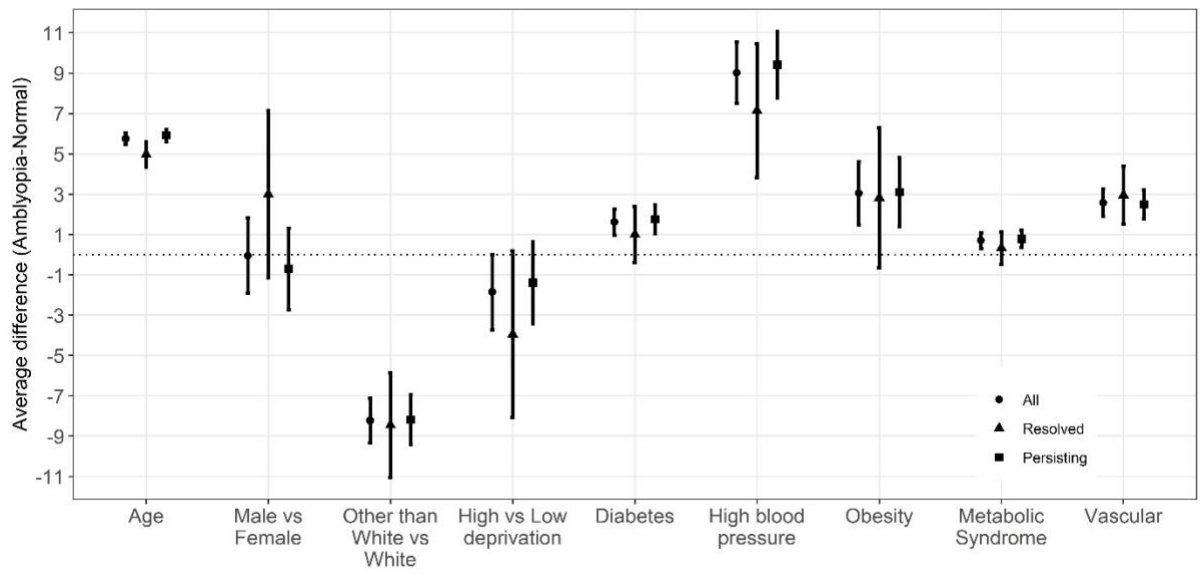

**Supplementary Figure 4.** Differences in the distribution of demographic and clinical characteristics between participants with amblyopia and unaffected vision, by amblyopia status.

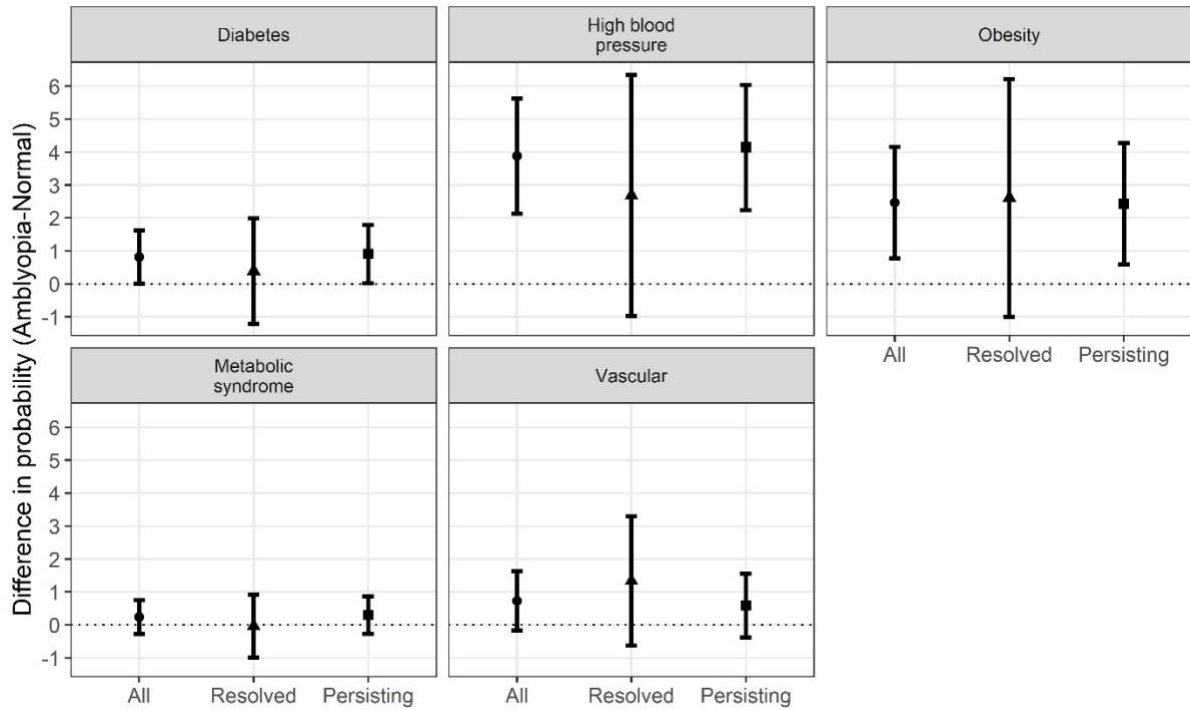

**Supplementary Figure 5.** Difference in the probability of self-reporting a disease diagnosed by medical doctor, between participants with amblyopia and controls (without amblyopia), by amblyopia category.

Legend: Metabolic syndrome was defined according to medically diagnosed diabetes mellitus (UK Biobank field “2443”) and high blood pressure (derived from field “6150”), and obesity (classified as BMI>30 kg/m<sup>2</sup>, derived from fields “21002” for weight and “12144” for height). Medically diagnosed vascular/ heart disease is relevant to being diagnosed with heart attack, stroke or angina all derived from field “6150”.

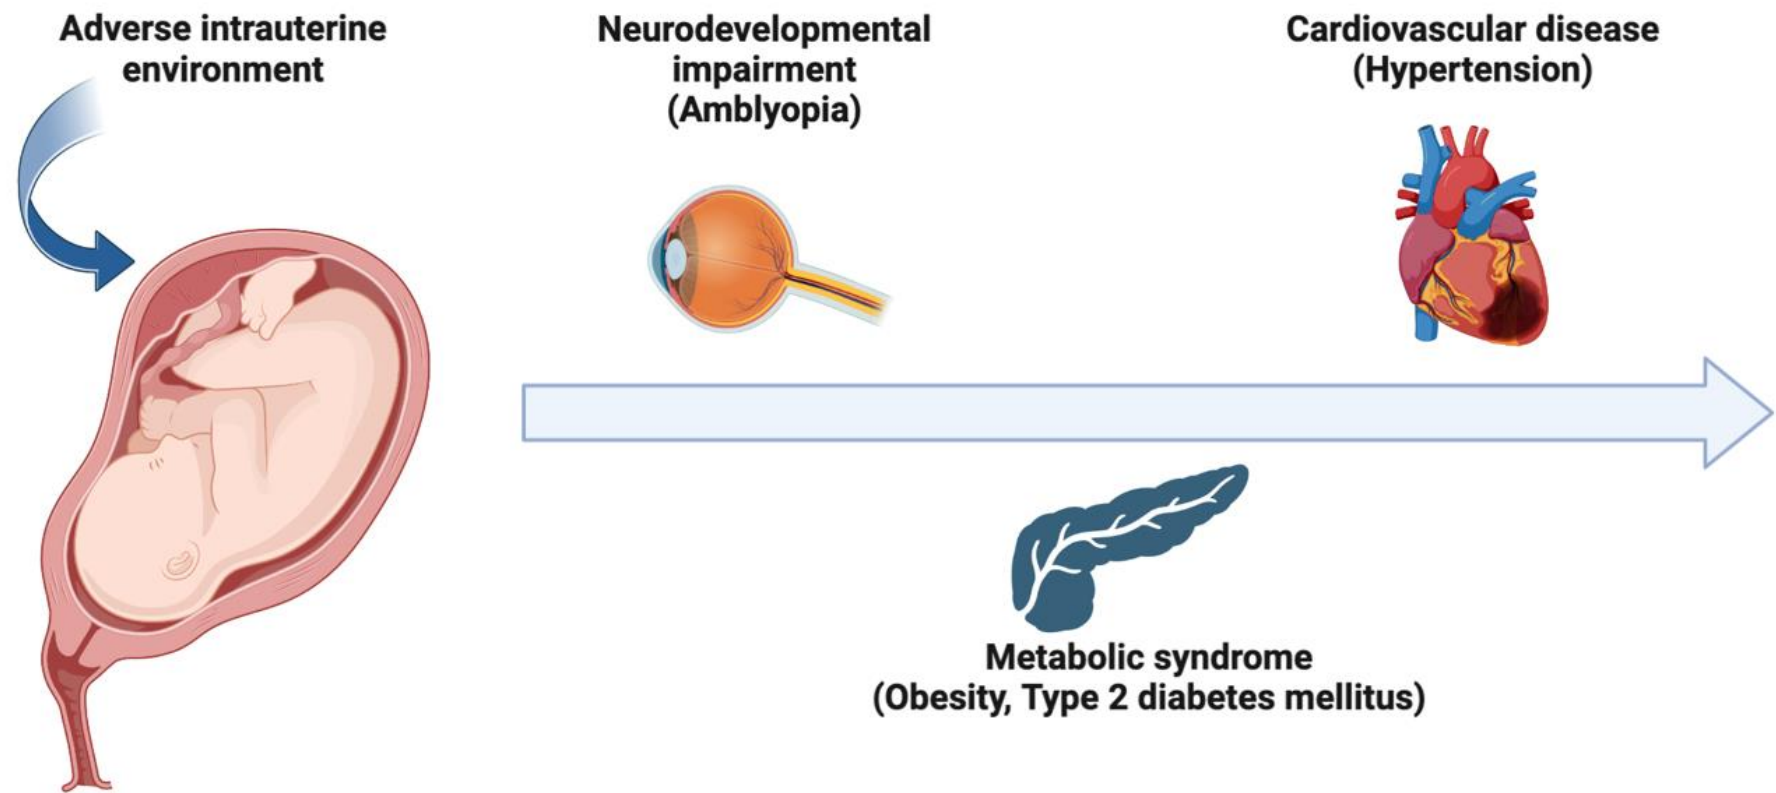

**Supplementary Figure 6.** Fetal origins of adult disease as pertains to amblyopia. Harmful intrauterine influences result in an increased risk of neurodevelopment impairment, such as amblyopia, in early life as well as cardiometabolic dysfunction manifesting in adulthood.

**Supplementary Table 1.** Participants' demographic and clinical characteristics by vision status.

|                                        | Control              | Amblyopia            |                      |                      |
|----------------------------------------|----------------------|----------------------|----------------------|----------------------|
|                                        | (unaffected vision)  | All                  | Resolved             | Persisting           |
| n (%)                                  | 18,481 (84.6)        | 3,377 (15.4)         | 627 (18.6)           | 2,750 (81.4)         |
| Age at recruitment                     | 51.3<br>(51.2; 51.4) | 57.1<br>(56.8; 57.4) | 56.3<br>(55.7; 57)   | 57.3<br>(57.0; 57.5) |
| Male participants, %                   | 47.2<br>(46.5; 47.9) | 47.1<br>(45.4; 48.9) | 50.2<br>(46.1; 54.3) | 46.5<br>(44.6; 48.4) |
| Other than white ethnic background, %  | 11.2<br>(10.8; 11.7) | 3.0<br>(2.4; 3.6)    | 2.8<br>(1.4; 4.1)    | 3.1<br>(2.4; 3.7)    |
| Live in a highly deprived area, %      | 46.3<br>(45.6; 47.0) | 44.4<br>(42.7; 46.1) | 42.3<br>(38.3; 46.4) | 44.9<br>(43.0; 46.8) |
| Obesity (BMI >30kg/m <sup>2</sup> ), % | 22.3<br>(21.7; 22.9) | 25.4<br>(23.9; 26.9) | 25.1<br>(21.6; 28.7) | 25.4<br>(23.8; 27.1) |
| <i>Missing, n (%)</i>                  | 79 (0.43)            | 8 (0.25)             | 1 (0.17)             | 7 (0.26)             |
| Conditions diagnosed by medical doctor |                      |                      |                      |                      |
| Diabetes mellitus, %                   | 2.8<br>(2.6; 3.1)    | 4.5<br>(3.7; 5.2)    | 3.8<br>(2.3; 5.4)    | 4.6<br>(3.8; 5.4)    |
| <i>Missing, n (%)</i>                  | 72 (0.39)            | 8 (0.25)             | 0 (0.0)              | 8 (0.30)             |
| High blood pressure, %                 | 19.0                 | 28.0                 | 26.2                 | 28.4                 |

|                       |              |              |              |              |
|-----------------------|--------------|--------------|--------------|--------------|
|                       | (18.5; 19.6) | (26.5; 29.6) | (22.5; 29.8) | (26.7; 30.2) |
| <i>Missing, n (%)</i> | 332 (1.8)    | 94 (2.9)     | 20 (3.5)     | 74 (2.8)     |
| Vascular disease, %   | 3.0          | 5.6          | 5.9          | 5.5          |
|                       | (2.7; 3.2)   | (4.8; 6.4)   | (4.0; 7.9)   | (4.6; 6.4)   |
| <i>Missing, n (%)</i> | 48 (0.26)    | 5 (0.16)     | 2 (0.35)     | 3 (0.11)     |
| Metabolic Syndrome, % | 0.9          | 1.6          | 1.3          | 1.7          |
|                       | (0.8; 1.1)   | (1.2; 2.1)   | (0.3; 2.2)   | (1.2; 2.2)   |
| <i>Missing, n (%)</i> | 457 (2.5)    | 110 (3.4)    | 21 (3.7)     | 89 (3.4)     |

---

High deprived areas defined as being in the 4th or 5th quintile of the Townsend index of deprivation (2011).

Metabolic syndrome was defined as the co-existence of medically diagnosed diabetes mellitus, high blood pressure, and obesity. Results are mean values, unless otherwise indicated, followed by 95% confidence interval.



**Supplementary Table 2.** Association between classification of amblyopia (i.e. i) all, ii) resolved, iii) persisting) and number of components relevant to the metabolic syndrome.

|                                                 | Number of metabolic syndrome components |                   |                    |
|-------------------------------------------------|-----------------------------------------|-------------------|--------------------|
|                                                 | One vs None                             | Two vs None       | Three vs None      |
|                                                 | RRR (95% CI)                            | RRR (95% CI)      | RRR (95% CI)       |
| <b>All confirmed amblyopia vs normal vision</b> | 1.22 (1.12; 1.34)                       | 1.29 (1.13; 1.48) | 1.40 (1.00; 1.95)  |
| 50-59 years vs 40-49 years                      | 1.40 (1.30; 1.51)                       | 2.18 (1.92; 2.48) | 3.48 (2.38; 5.10)  |
| 60-75 years vs 40-49 years                      | 1.87 (1.72; 2.04)                       | 3.48 (3.03; 4.01) | 6.62 (4.46; 9.82)  |
| Male vs Female                                  | 1.25 (1.18; 1.34)                       | 1.40 (1.26; 1.55) | 1.88 (1.43; 2.48)  |
| Other than white ethnic background vs white     | 1.42 (1.28; 1.58)                       | 1.98 (1.68; 2.33) | 1.82 (1.17; 2.82)  |
| Townsend index vs 1st quintile (least deprived) |                                         |                   |                    |
| 2nd quintile                                    | 0.93 (0.84; 1.04)                       | 1.31 (1.09; 1.58) | 1.00 (0.59; 1.69)  |
| 3rd quintile                                    | 1.05 (0.95; 1.17)                       | 1.36 (1.12; 1.64) | 1.28 (0.77; 2.12)  |
| 4th quintile                                    | 1.12 (1.01; 1.24)                       | 1.56 (1.30; 1.87) | 1.56 (0.97; 2.51)  |
| 5th quintile (most deprived)                    | 1.23 (1.11; 1.36)                       | 2.02 (1.69; 2.41) | 2.82 (1.79; 4.43)  |
| <b>Resolved amblyopia vs normal vision</b>      | 1.26 (1.04; 1.53)                       | 1.18 (0.87; 1.59) | 1.10 (0.51; 2.38)  |
| 50-59 years vs 40-49 years                      | 1.42 (1.31; 1.53)                       | 2.15 (1.88; 2.46) | 3.60 (2.39; 5.44)  |
| 60-75 years vs 40-49 years                      | 1.90 (1.73; 2.08)                       | 3.56 (3.07; 4.14) | 8.07 (5.28; 12.34) |
| Male vs Female                                  | 1.25 (1.17; 1.34)                       | 1.43 (1.28; 1.60) | 1.97 (1.44; 2.68)  |
| Other than white ethnic background vs white     | 1.43 (1.28; 1.60)                       | 1.97 (1.66; 2.34) | 2.05 (1.31; 3.21)  |

Townsend index vs 1st quintile (least deprived)

|                              |                   |                   |                   |
|------------------------------|-------------------|-------------------|-------------------|
| 2nd quintile                 | 0.94 (0.84; 1.06) | 1.35 (1.10; 1.66) | 1.35 (0.74; 2.48) |
| 3rd quintile                 | 1.08 (0.96; 1.21) | 1.38 (1.12; 1.69) | 1.62 (0.90; 2.91) |
| 4th quintile                 | 1.15 (1.03; 1.28) | 1.59 (1.30; 1.93) | 1.81 (1.03; 3.19) |
| 5th quintile (most deprived) | 1.24 (1.11; 1.39) | 2.02 (1.66; 2.47) | 3.53 (2.06; 6.07) |

**Persisting amblyopia vs normal vision**

|                                              |                   |                   |                   |
|----------------------------------------------|-------------------|-------------------|-------------------|
| <b>Persisting amblyopia vs normal vision</b> | 1.22 (1.11; 1.34) | 1.31 (1.14; 1.52) | 1.45 (1.02; 2.05) |
| 50-59 years vs 40-49 years                   | 1.39 (1.29; 1.50) | 2.19 (1.93; 2.50) | 3.47 (2.36; 5.10) |
| 60-75 years vs 40-49 years                   | 1.86 (1.70; 2.02) | 3.46 (3.00; 3.99) | 6.77 (4.54; 10.1) |
| Male vs Female                               | 1.26 (1.18; 1.34) | 1.42 (1.27; 1.57) | 1.80 (1.36; 2.37) |
| Other than white ethnic background vs white  | 1.42 (1.27; 1.58) | 1.95 (1.65; 2.30) | 1.87 (1.20; 2.91) |

Townsend index vs 1st quintile (least deprived)

|                              |                   |                   |                   |
|------------------------------|-------------------|-------------------|-------------------|
| 2nd quintile                 | 0.93 (0.83; 1.04) | 1.29 (1.06; 1.56) | 0.96 (0.57; 1.63) |
| 3rd quintile                 | 1.06 (0.95; 1.18) | 1.35 (1.12; 1.64) | 1.27 (0.77; 2.10) |
| 4th quintile                 | 1.12 (1.02; 1.25) | 1.53 (1.28; 1.84) | 1.48 (0.92; 2.39) |
| 5th quintile (most deprived) | 1.23 (1.10; 1.36) | 2.04 (1.70; 2.44) | 2.62 (1.66; 4.14) |

0.001 < p < 0.05

p < 0.001

Results are relative risk ratios (95% confidence intervals) derived from multinomial logistic regression models, adjusted for all the covariates shown in table.

**Supplementary Table 3.** Baseline characteristics of the cohort for survival analysis.

|                                                    | Amblyopia                         |                              |                            |                              |
|----------------------------------------------------|-----------------------------------|------------------------------|----------------------------|------------------------------|
|                                                    | Control<br>(unaffected<br>vision) | All                          | Resolved                   | Persisting                   |
| n (%)                                              | 17,860 (84.5)                     | 3,269 (15.5)                 | 605 (18.5)                 | 2,664 (81.5)                 |
| Age, years                                         | 51.3<br>(51.2; 51.4)              | 57.1<br>(56.8; 57.3)         | 56.3<br>(55.7; 57.0)       | 57.3<br>(57.0; 57.5)         |
| Male participants, n (%)                           | 8,491 (47.5)<br>(46.8; 47.5)      | 1,535 (47.0)<br>(45.2; 48.7) | 298 (49.3)<br>(45.2; 53.3) | 1,237 (46.4)<br>(44.5; 48.4) |
| Other than white ethnic background, n (%)          | 1,985 (11.1)<br>(10.7; 11.6)      | 100 (3.1)<br>(2.5; 3.7)      | 16 (2.6)<br>(1.6; 4.4)     | 84 (3.2)<br>(2.5; 3.9)       |
| Live in a highly deprived area, n (%)              | 7,179 (40.2)<br>(39.5; 40.9)      | 1273 (38.9)<br>(37.3; 40.6)  | 220 (36.4)<br>(35.5; 40.4) | 1053 (39.5)<br>(37.7; 41.4)  |
| Previous myocardial infarction, n (%)              | 207 (1.2)<br>(1.0; 1.3)           | 63 (1.9)<br>(1.5; 2.5)       | 9 (1.5)<br>(0.7; 2.9)      | 54 (2.0)<br>(1.5; 2.7)       |
| Incident myocardial infarction, n (%) <sup>1</sup> | 326 (1.8)<br>(1.7; 2.1)           | 120 (3.7)<br>(3.1; 4.5)      | 25 (4.2)<br>(2.8; 6.2)     | 95 (3.6)<br>(3.0; 4.5)       |
| Previous stroke, n (%)                             | 169 (0.9)<br>(0.8; 1.1)           | 49 (1.5)<br>(1.1; 2.0)       | 9 (1.5)<br>(0.8; 2.9)      | 40 (1.5)<br>(1.1; 2.1)       |
| Incident stroke, n (%) <sup>1</sup>                | 182 (1.0)<br>(0.9; 1.2)           | 64 (2.0)<br>(1.5; 2.5)       | 6 (1.0)<br>(0.4; 2.3)      | 58 (2.2)<br>(1.7; 2.9)       |
| Died during study period, n (%)                    | 516 (2.9)<br>(2.7; 3.1)           | 215 (6.6)<br>(5.8; 7.5)      | 26 (4.3)<br>(2.9; 6.3)     | 189 (7.1)<br>(6.2; 8.2)      |

Highly deprived areas defined as being in the 4th or 5th quintile of the Townsend index of deprivation (2011). <sup>1</sup>Proportions for incident disease take, as denominator, those without a previous event.

**Supplementary Table 4.** Association between classification of amblyopia (i.e. i) all, ii) resolved, iii) persisting) and incident cardiovascular events and dementia.

|                                                 | Myocardial infarction | All-cause stroke  | All-cause death   |
|-------------------------------------------------|-----------------------|-------------------|-------------------|
|                                                 | HR (95% CI)           | HR (95% CI)       | HR (95% CI)       |
| All confirmed amblyopia vs normal vision        | 1.38 (1.11; 1.72)     | 1.20 (0.89; 1.62) | 1.36 (1.15; 1.60) |
| Per 10-year increase in age                     | 2.08 (1.83; 2.36)     | 2.58 (2.16; 3.09) | 2.80 (2.52; 3.11) |
| Male vs Female                                  | 3.03 (2.45; 3.74)     | 1.20 (0.89; 1.62) | 1.50 (1.29; 1.74) |
| Other than white ethnic background vs white     | 0.98 (0.67; 1.44)     | 1.31 (0.80; 2.14) | 1.33 (1.00; 1.77) |
| Townsend index vs 1st quintile (least deprived) |                       |                   |                   |
| 2nd quintile                                    | 0.92 (0.69; 1.23)     | 1.22 (0.83; 1.78) | 1.15 (0.92; 1.45) |
| 3rd quintile                                    | 0.81 (0.60; 1.09)     | 1.15 (0.78; 1.70) | 1.11 (0.88; 1.41) |
| 4th quintile                                    | 0.98 (0.73; 1.32)     | 0.95 (0.62; 1.45) | 1.25 (0.98; 1.58) |
| 5th quintile (most deprived)                    | 1.35 (1.02; 1.79)     | 1.34 (0.89; 1.99) | 1.65 (1.31; 2.07) |

|                                                 |                   |                   |                   |
|-------------------------------------------------|-------------------|-------------------|-------------------|
| <b>Resolved</b> amblyopia vs normal vision      | 1.56 (1.03; 2.36) | 0.62 (0.27; 1.40) | 0.91 (0.61; 1.36) |
| Per 10-year increase in age                     | 2.01 (1.75; 2.31) | 2.62 (2.15; 3.19) | 2.78 (2.47; 3.12) |
| Male vs Female                                  | 1.56 (1.03; 2.36) | 1.62 (1.20; 2.17) | 1.42 (1.20; 1.68) |
| Other than white ethnic background vs white     | 1.02 (0.69; 1.51) | 1.33 (0.80; 2.21) | 1.25 (0.92; 1.70) |
| Townsend index vs 1st quintile (least deprived) |                   |                   |                   |
| 2nd quintile                                    | 0.93 (0.67; 1.30) | 1.02 (0.66; 1.58) | 1.08 (0.83; 1.41) |
| 3rd quintile                                    | 0.85 (0.61; 1.20) | 0.95 (0.61; 1.49) | 1.05 (0.80; 1.37) |
| 4th quintile                                    | 1.02 (0.73; 1.42) | 0.94 (0.59; 1.49) | 1.18 (0.90; 1.55) |
| 5th quintile (most deprived)                    | 1.32 (0.96; 1.83) | 1.24 (0.79; 1.96) | 1.53 (1.17; 1.99) |
| <b>Persisting</b> amblyopia vs normal vision    | 1.36 (1.07; 1.72) | 1.33 (0.98; 1.81) | 1.45 (1.21; 1.72) |
| Per 10-year increase in age                     | 2.06 (1.81; 2.35) | 2.58 (2.15; 3.09) | 1.11 (1.10; 1.12) |
| Male vs Female                                  | 3.03 (2.44; 3.76) | 1.51 (1.16; 1.95) | 1.47 (1.26; 1.71) |
| Other than white ethnic background vs white     | 1.01 (0.69; 1.48) | 1.31 (0.80; 2.15) | 1.33 (1.00; 1.77) |

Townsend index vs 1st quintile (least deprived)

|                              |                   |                   |                   |
|------------------------------|-------------------|-------------------|-------------------|
| 2nd quintile                 | 0.94 (0.70; 1.26) | 1.23 (0.84; 1.80) | 1.14 (0.90; 1.44) |
| 3rd quintile                 | 0.80 (0.59; 1.10) | 1.09 (0.73; 1.63) | 1.06 (0.83; 1.35) |
| 4th quintile                 | 0.99 (0.73; 1.34) | 0.93 (0.61; 1.44) | 1.22 (0.96; 1.56) |
| 5th quintile (most deprived) | 1.29 (0.96; 1.72) | 1.32 (0.88; 1.97) | 1.60 (1.27; 2.02) |

0.001 < p < 0.05

p < 0.001

Results are hazard ratios (95% confidence intervals) derived from Cox proportional hazards models. The full model adjusted for all the covariates shown in table.

**Supplementary Table 5.** Balance statistics for the propensity matched analysis.

|                            | Resolved         |                     |              |                  |                     |              |                  |                     |              |
|----------------------------|------------------|---------------------|--------------|------------------|---------------------|--------------|------------------|---------------------|--------------|
|                            | Standardized Raw | differences Matched | Variance Raw | Standardized Raw | differences Matched | Variance Raw | Standardized Raw | differences Matched | Variance Raw |
| <b>Diabetes</b>            |                  |                     |              |                  |                     |              |                  |                     |              |
| Age                        |                  |                     |              |                  |                     |              |                  |                     |              |
| [50-59]yrs                 | 0.010            | 1.17E-16            | 1.01         | 0.014            | -2.33E-16           | 1.01         | 0.014            | 0.00E+00            | 1.01         |
| [60-75]yrs                 | 0.595            | -2.23E-16           | 1.61         | 0.608            | 1.11E-16            | 1.61         | 0.595            | 1.12E-16            | 1.64         |
| Sex                        |                  |                     |              |                  |                     |              |                  |                     |              |
| Male                       | -0.001           | -2.22E-16           | 1.00         | -0.014           | -1.11E-16           | 1.00         | -0.011           | -5.57E-16           | 1.00         |
| Ethnicity                  |                  |                     |              |                  |                     |              |                  |                     |              |
| Non-white                  | -0.319           | 1.22E-16            | 0.30         | -0.316           | 8.04E-17            | 0.30         | -0.320           | -1.83E-16           | 0.30         |
| Quintiles of deprivation   |                  |                     |              |                  |                     |              |                  |                     |              |
| 2nd Q                      | 0.030            | -1.40E-16           | 1.05         | 0.026            | -2.80E-16           | 1.04         | 0.032            | 2.09E-16            | 1.05         |
| 3rd Q                      | -0.019           | 7.14E-17            | 0.97         | -0.013           | -7.11E-17           | 0.98         | -0.017           | -2.14E-16           | 0.97         |
| 4th Q                      | -0.038           | 4.70E-16            | 0.95         | -0.045           | 6.75E-17            | 0.94         | -0.038           | 0.00E+00            | 0.95         |
| 5th Q (more ~)             | -0.006           | 0                   | 0.99         | 0.012            | 1.97E-16            | 1.02         | -0.007           | -2E-16              | 0.99         |
| <b>High blood pressure</b> |                  |                     |              |                  |                     |              |                  |                     |              |
| Age                        |                  |                     |              |                  |                     |              |                  |                     |              |
| [50-59]yrs                 | 0.014            | 0.00E+00            | 1.01         | -0.003           | -1.17E-16           | 1.00         | 0.018            | -1.16E-16           | 1.01         |
| [60-75]yrs                 | 0.595            | 1.12E-16            | 1.64         | 0.537            | 0.00E+00            | 1.62         | 0.608            | 2.23E-16            | 1.64         |
| Sex                        |                  |                     |              |                  |                     |              |                  |                     |              |
| Male                       | -0.011           | -5.57E-16           | 1.00         | 0.060            | 0.00E+00            | 1.01         | -0.026           | -2.23E-16           | 1.00         |
| Ethnicity                  |                  |                     |              |                  |                     |              |                  |                     |              |
| Non-white                  | -0.320           | -1.83E-16           | 0.30         | -0.336           | 0.00E+00            | 0.27         | -0.317           | -2.01E-16           | 0.30         |



|                                 |        |           |      |        |           |      |        |           |      |
|---------------------------------|--------|-----------|------|--------|-----------|------|--------|-----------|------|
| <b>Quintiles of deprivation</b> |        |           |      |        |           |      |        |           |      |
| 2nd Q                           | 0.032  | 2.09E-16  | 1.05 | 0.058  | 0.00E+00  | 1.09 | 0.026  | 7.01E-17  | 1.04 |
| 3rd Q                           | -0.017 | -2.14E-16 | 0.97 | -0.052 | 7.33E-17  | 0.92 | -0.010 | -7.08E-17 | 0.98 |
| 4th Q                           | -0.038 | 0.00E+00  | 0.95 | 0.001  | -1.31E-16 | 1.00 | -0.047 | -2.03E-16 | 0.94 |
| 5th Q (more ~)                  | -0.007 | -2E-16    | 0.99 | -0.096 | 7.1E-17   | 0.87 | 0.011  | -6.58E-17 | 1.01 |
| <b>Obesity</b>                  |        |           |      |        |           |      |        |           |      |
| <b>Age</b>                      |        |           |      |        |           |      |        |           |      |
| [50-59]yrs                      | 0.012  | 2.33E-16  | 1.01 | -0.002 | 0.00E+00  | 1.00 | 0.015  | 1.17E-16  | 1.01 |
| [60-75]yrs                      | 0.594  | -1.11E-16 | 1.61 | 0.530  | 1.12E-16  | 1.59 | 0.608  | -1.11E-16 | 1.61 |
| <b>Sex</b>                      |        |           |      |        |           |      |        |           |      |
| Male                            | -0.001 | -3.34E-16 | 1.00 | 0.063  | 0.00E+00  | 1.00 | -0.015 | -3.34E-16 | 1.00 |
| <b>Ethnicity</b>                |        |           |      |        |           |      |        |           |      |
| Non-white                       | -0.320 | 0.00E+00  | 0.30 | -0.332 | 0.00E+00  | 0.28 | -0.317 | -4.02E-17 | 0.30 |
| <b>Quintiles of deprivation</b> |        |           |      |        |           |      |        |           |      |
| 2nd Q                           | 0.030  | -2.79E-16 | 1.05 | 0.049  | 0.00E+00  | 1.08 | 0.026  | -2.80E-16 | 1.04 |
| 3rd Q                           | -0.018 | 2.86E-16  | 0.97 | -0.042 | -7.28E-17 | 0.94 | -0.013 | 1.42E-16  | 0.98 |
| 4th Q                           | -0.034 | 5.36E-16  | 0.96 | -0.004 | 1.31E-16  | 1.00 | -0.041 | 3.37E-16  | 0.95 |
| 5th Q (more ~)                  | -0.008 | -3.99E-16 | 0.99 | -0.089 | 0         | 0.88 | 0.009  | -2.63E-16 | 1.01 |
| <b>Metabolic syndrome</b>       |        |           |      |        |           |      |        |           |      |
| <b>Age</b>                      |        |           |      |        |           |      |        |           |      |
| [50-59]yrs                      | 0.015  | 4.66E-16  | 1.01 | -0.002 | 0         | 1.00 | 0.018  | 4.66E-16  | 1.01 |
| [60-75]yrs                      | 0.594  | -4.46E-16 | 1.64 | 0.533  | 0.00E+00  | 1.62 | 0.607  | -2.23E-16 | 1.64 |
| <b>Sex</b>                      |        |           |      |        |           |      |        |           |      |
| Male                            | -0.011 | -3.34E-16 | 1.00 | 0.063  | 0         | 1.01 | -0.027 | -2.23E-16 | 1.00 |
| <b>Ethnicity</b>                |        |           |      |        |           |      |        |           |      |
| Non-white                       | -0.314 | 1.01E-16  | 0.30 | -0.330 | 0         | 0.27 | -0.310 | 6.02E-17  | 0.31 |

|                          |        |           |      |        |           |      |        |           |      |
|--------------------------|--------|-----------|------|--------|-----------|------|--------|-----------|------|
| Quintiles of deprivation |        |           |      |        |           |      |        |           |      |
| 2nd Q                    | 0.030  | -6.98E-17 | 1.05 | 0.053  | 0         | 1.09 | 0.025  | -1.4E-16  | 1.04 |
| 3rd Q                    | -0.017 | 4.27E-16  | 0.97 | -0.052 | -7.32E-17 | 0.92 | -0.010 | 4.25E-16  | 0.98 |
| 4th Q                    | -0.037 | -6.71E-17 | 0.95 | 0.002  | 1.31E-16  | 1.00 | -0.046 | -6.75E-17 | 0.94 |
| 5th Q (more ~)           | -0.007 | -3.33E-16 | 0.99 | -0.093 | 7.10E-17  | 0.88 | 0.011  | -1.32E-16 | 1.02 |
| <b>Vascular</b>          |        |           |      |        |           |      |        |           |      |
| Age                      |        |           |      |        |           |      |        |           |      |
| [50-59]yrs               | 0.011  | 7.00E-16  | 1.01 | -0.006 | 0.00E+00  | 1.00 | 0.014  | 2.33E-16  | 1.01 |
| [60-75]yrs               | 0.594  | -4.46E-16 | 1.61 | 0.533  | 1.12E-16  | 1.59 | 0.607  | -1.11E-16 | 1.61 |
| Sex                      |        |           |      |        |           |      |        |           |      |
| Male                     | 0.001  | -8.89E-16 | 1.00 | 0.064  | 0.00E+00  | 1.00 | -0.013 | -6.68E-16 | 1.00 |
| Ethnicity                |        |           |      |        |           |      |        |           |      |
| Non-white                | -0.319 | -2.03E-17 | 0.30 | -0.330 | 0.00E+00  | 0.28 | -0.317 | -6.04E-17 | 0.30 |
| Quintiles of deprivation |        |           |      |        |           |      |        |           |      |
| 2nd Q                    | 0.031  | -6.98E-17 | 1.05 | 0.055  | -6.85E-17 | 1.09 | 0.026  | -7.01E-17 | 1.04 |
| 3rd Q                    | -0.020 | 1.43E-16  | 0.97 | -0.046 | 7.30E-17  | 0.93 | -0.014 | 0.00E+00  | 0.98 |
| 4th Q                    | -0.037 | 0         | 0.95 | -0.004 | 0         | 1.00 | -0.044 | -4.05E-16 | 0.94 |
| 5th Q (more ~)           | -0.005 | 1.99E-16  | 0.99 | -0.087 | -7.04E-17 | 0.88 | 0.012  | 1.97E-16  | 1.02 |

---

**Supplementary Table 6.** Baseline characteristics of the cohort with retinal imaging data.

|                                           | <b>Control</b><br><b>(n=35,061)</b> | <b>Amblyopia</b><br><b>(n=623)</b> | <b>Fellow</b><br><b>(n=663)</b> |
|-------------------------------------------|-------------------------------------|------------------------------------|---------------------------------|
| Age, years                                | 54.9<br>(54.8; 55.0)                | 55.7<br>(55.1; 56.3)               | 55.6<br>(55.0; 56.2)            |
| Male participants, n (%)                  | 15,650 (44.6)<br>(44.1; 45.2)       | 262 (42.1)<br>(38.1; 46.0)         | 271 (40.9)<br>(37.1; 44.7)      |
| Other than white ethnic background, n (%) | 32,272 (92.0)<br>(91.7; 92.3)       | 602 (96.6)<br>(94.9; 97.9)         | 646 (97.4)<br>(95.9; 98.5)      |
| Live in a highly deprived area, n (%)     | 9,579 (27.3)<br>(26.8; 27.8)        | 179 (28.7)<br>(25.2; 32.5)         | 195 (29.4)<br>(26.0; 33.0)      |
| Smoking status, n (%)                     |                                     |                                    |                                 |
| Never                                     | 20,067 (57.2)<br>(56.7; 57.8)       | 347 (55.7)<br>(51.7; 59.6)         | 372 (56.1)<br>(52.2; 59.9)      |
| Previous                                  | 11,662 (33.2)<br>(32.8; 33.8)       | 214 (34.3)<br>(30.6; 38.2)         | 216 (32.6)<br>(29.0; 36.3)      |
| Current                                   | 3,332 (9.5)<br>(9.2; 9.8)           | 62 (10.0)<br>(7.7; 12.8)           | 75 (11.3)<br>(9.0; 14.0)        |
| Alcohol drinking status, n (%)            |                                     |                                    |                                 |
| Never                                     | 1,522 (4.3)<br>(4.1; 4.6)           | 22 (3.5)<br>(2.2; 5.3)             | 22 (3.3)<br>(2.1; 5.0)          |
| Previous                                  | 1,137 (3.2)<br>(3.1; 3.4)           | 21 (3.4)<br>(2.1; 5.1)             | 21 (3.2)<br>(2.0; 4.8)          |
| Current                                   | 32,402 (92.4)<br>(92.1; 92.7)       | 580 (93.1)<br>(90.8; 95.0)         | 620 (93.5)<br>(91.4; 95.3)      |
| Body mass index, kg/m <sup>2</sup>        | 27.1                                | 27.3                               | 27.3                            |

|                                   |                 |                |                |
|-----------------------------------|-----------------|----------------|----------------|
|                                   | (27.0; 27.2)    | (26.9; 27.7)   | (26.9; 27.7)   |
| Diabetes mellitus, n (%)          | 1,219 (3.5)     | 20 (3.2)       | 24 (3.6)       |
|                                   | (3.3; 3.7)      | (2.0; 4.9)     | (2.3; 5.3)     |
| High blood pressure, n (%)        | 8,269 (23.6)    | 156 (25.0)     | 165 (24.9)     |
|                                   | (23.1; 24.0)    | (21.7; 28.6)   | (21.6; 28.4)   |
| Refractive error, dioptres (D)    | -0.46           | 1.68           | 0.83           |
|                                   | (-0.48; -0.44)  | (1.37; 1.99)   | (0.69; 1.07)   |
| Visual acuity, logMAR             | 0.00            | 0.38           | 0.01           |
|                                   | (-0.002; 0.002) | (0.35; 0.41)   | (-0.003; 0.02) |
| <b>Retinal layer thicknesses</b>  |                 |                |                |
| mRNFL, $\mu\text{m}$              | 25.8            | 25.2           | 25.4 (2.4)     |
|                                   | (25.7; 25.8)    | (24.8; 25.6)   | (25.2; 25.6)   |
| mGC-IPL, $\mu\text{m}$            | 90.1            | 87.9           | 89.2           |
|                                   | (90.0; 90.2)    | (87.2; 88.6)   | (88.2; 89.8)   |
| <b>Retinovascular indices</b>     |                 |                |                |
| Arteriolar caliber, $\mu\text{m}$ | 61.7            | 63.7           | 62.7           |
|                                   | (61.6; 61.8)    | (63.2; 64.2)   | (62.2; 63.2)   |
| Venular caliber, $\mu\text{m}$    | 68              | 71.9           | 69.7           |
|                                   | (67.9; 68.1)    | (61.6; 61.8)   | (69.1; 70.3)   |
| Fractal dimension, units          | 1.484           | 1.478          | 1.482          |
|                                   | (1.484; 1.484)  | (1.475; 1.481) | (1.479; 1.485) |
| Distance tortuosity, units        | 3.43            | 3.61           | 3.43           |
|                                   | (3.42; 3.44)    | (3.49; 3.73)   | (3.32; 3.54)   |
| <b>Optic nerve morphology</b>     |                 |                |                |
| Cup height, units                 | 62.9            | 61.8           | 62             |

|                    |                |                |                |
|--------------------|----------------|----------------|----------------|
|                    | (62.7; 63.1)   | (60.4; 63.2)   | (60.7; 63.3)   |
| Cup width, units   | 60.4           | 59.7           | 60             |
|                    | (60.2; 60.6)   | (61.6; 61.8)   | (58.6; 61.4)   |
| Disc height, units | 132.2          | 130.5          | 131.3          |
|                    | (132.0; 132.4) | (128.8; 132.2) | (129.6; 133.0) |
| Disc width, units  | 125.1          | 123.6          | 124.6          |
|                    | (124.9; 125.3) | (121.8; 125.4) | (122.9; 126.3) |

High deprived areas defined as being in the 4th or 5th quintile of the Townsend index of deprivation (2011). Data for optic nerve morphology were available for 32,525 controls, 544 cases and 583 fellow eyes. Results are mean values, unless otherwise indicated, followed by 95% confidence interval.

**Supplementary Table 7.** Association between amblyopia and retinal imaging outcome measures stratified into persisting (logMAR visual acuity  $\geq 0.06$ ) and resolved (logMAR visual acuity  $< 0.06$ ) amblyopia in the fully adjusted model.

| Outcome                        | Amblyopia                          |                      |                                  |                      |
|--------------------------------|------------------------------------|----------------------|----------------------------------|----------------------|
|                                | Persisting ( <i>n</i> cases = 483) |                      | Resolved ( <i>n</i> cases = 140) |                      |
|                                | b (95% CI)                         | <i>p</i> -value      | b (95% CI)                       | <i>p</i> -value      |
| <b>Retinovascular</b>          |                                    |                      |                                  |                      |
| Arteriolar caliber, per SD     | 0.00 (-0.09; 0.08)                 | 0.92                 | 0.17 (0.01; 0.32)                | 0.033                |
| Venular caliber, per SD        | 0.24 (0.16; 0.33)                  | $2.7 \times 10^{-8}$ | 0.37 (0.22; 0.53)                | $3.1 \times 10^{-6}$ |
| Distance tortuosity, per SD    | 0.14 (0.05; 0.23)                  | 0.002                | 0.04 (-0.12; 0.20)               | 0.63                 |
| Fractal dimension, per SD      | -0.20 (-0.28; -0.12)               | $2.7 \times 10^{-6}$ | -0.30 (-0.45; -0.15)             | $1.3 \times 10^{-4}$ |
| <b>Retinal layer thickness</b> |                                    |                      |                                  |                      |
| mRNFL, per $\mu\text{m}$       | -0.11 (-0.36; 0.14)                | 0.37                 | -0.50 (-0.95; -0.05)             | 0.029                |
| mGC-IPL, per $\mu\text{m}$     | -2.97 (-3.68; -2.27)               | $1 \times 10^{-16}$  | -1.70 (-2.99; -0.40)             | 0.010                |
| <b>Optic nerve morphology</b>  |                                    |                      |                                  |                      |
| Cup height, per SD             | -0.12 (-0.21; -0.02)               | 0.017                | -0.07 (-0.25; 0.11)              | 0.43                 |
| Cup width, per SD              | -0.09 (-0.19; 0.00)                | 0.05                 | 0.09 (-0.09; 0.27)               | 0.30                 |
| Disc height, per SD            | -0.17 (-0.27; -0.08)               | $3.6 \times 10^{-4}$ | -0.14 (-0.32; 0.03)              | 0.11                 |
| Disc width, per SD             | -0.17 (-0.27; -0.08)               | $3.6 \times 10^{-4}$ | 0.04 (-0.14; 0.22)               | 0.64                 |

All models were adjusted for age, sex, ethnicity, socioeconomic deprivation, refractive error, diabetes mellitus, alcohol consumption, smoking history, and body mass index. Results are beta coefficients (95% confidence interval) derived from linear regression models. mGC-IPL: macular ganglion cell-inner plexiform layer, mRFNL: macular retinal nerve fiber layer, SD: standard deviation.
